# Supplementary material for: The Rice Phosphate Transporter Protein OsPT8 Regulates Disease Resistance and Plant Growth
Source: PubMed Central journal article supplement (PMC6443681; doi:10.1038/s41598-019-41718-9), 2019-04-01
Supplement: 41598_2019_41718_MOESM1_ESM.pdf [file 41598_2019_41718_MOESM1_ESM.pdf]

# **The Rice Phosphate Transporter Protein OsPT8 Regulates Disease Resistance and Plant Growth**

Zheng Dong<sup>1,a</sup>, Wei Li<sup>1,a,\*</sup>, Jing Liu<sup>1</sup>, Lihua Li<sup>1</sup>, Sujun Pan<sup>1</sup>, Saijun Liu<sup>1</sup>, Jia Gao<sup>1</sup>, Ling Liu<sup>1</sup>, Xionglun Liu, Guo-Liang Wang<sup>1,2</sup>, Liangying Dai<sup>1,\*</sup>

<sup>1</sup> *Hunan Provincial Key Laboratory of Crop Germplasm Innovation and Utilization and College of Plant Protection, Hunan Agricultural University, Changsha, Hunan 410128, P.R. China.*

<sup>2</sup> *Department of Plant Pathology, Ohio State University, Columbus, OH 43210, USA*

<sup>a</sup> *These authors contributed equally to this work*

<sup>\*</sup> *Correspondence: daily@hunau.net; liwei350551@163.com*

## Supplementary information

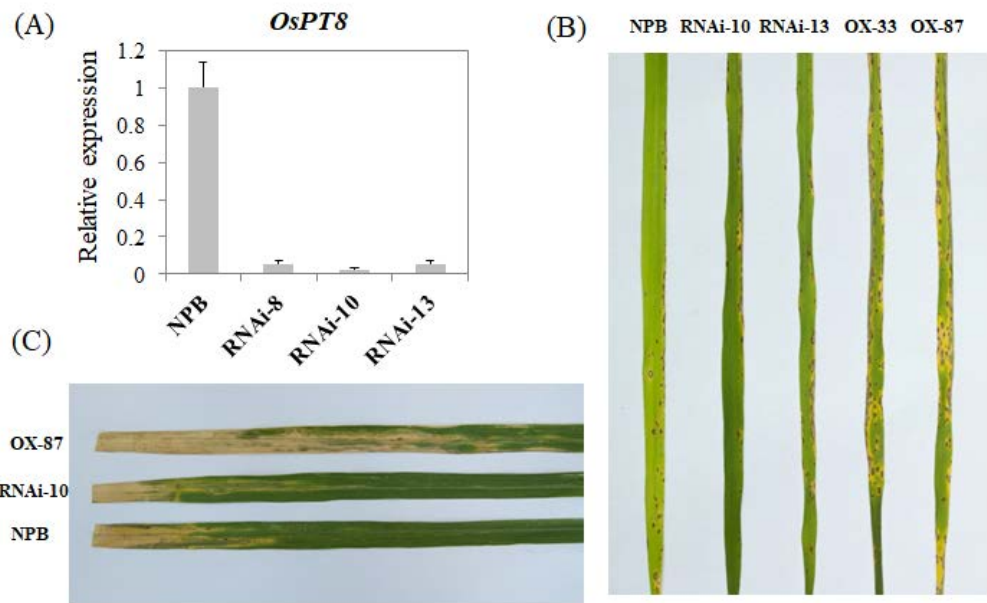

Figure S1. Disease resistance phenotypes of the *OsPT8* OX and RNAi plants. (A) *OsPT8* relative transcription levels in *OsPT8*-RNAi plants. Error bars indicate the SD from three biological replicates (n = 3); (B) Disease resistance phenotypes of the *OsPT8*-OX, *OsPT8*-RNAi and wild-type (NPB) plants after spray inoculation with *M. oryzae* isolate 110-2 (Photographed at 7 dpi); (C) Disease resistance phenotypes of the *OsPT8*-OX, *OsPT8*-RNAi and NPB plants after inoculation with *Xoo* strain PXO99 (Photographed at 14 dpi).

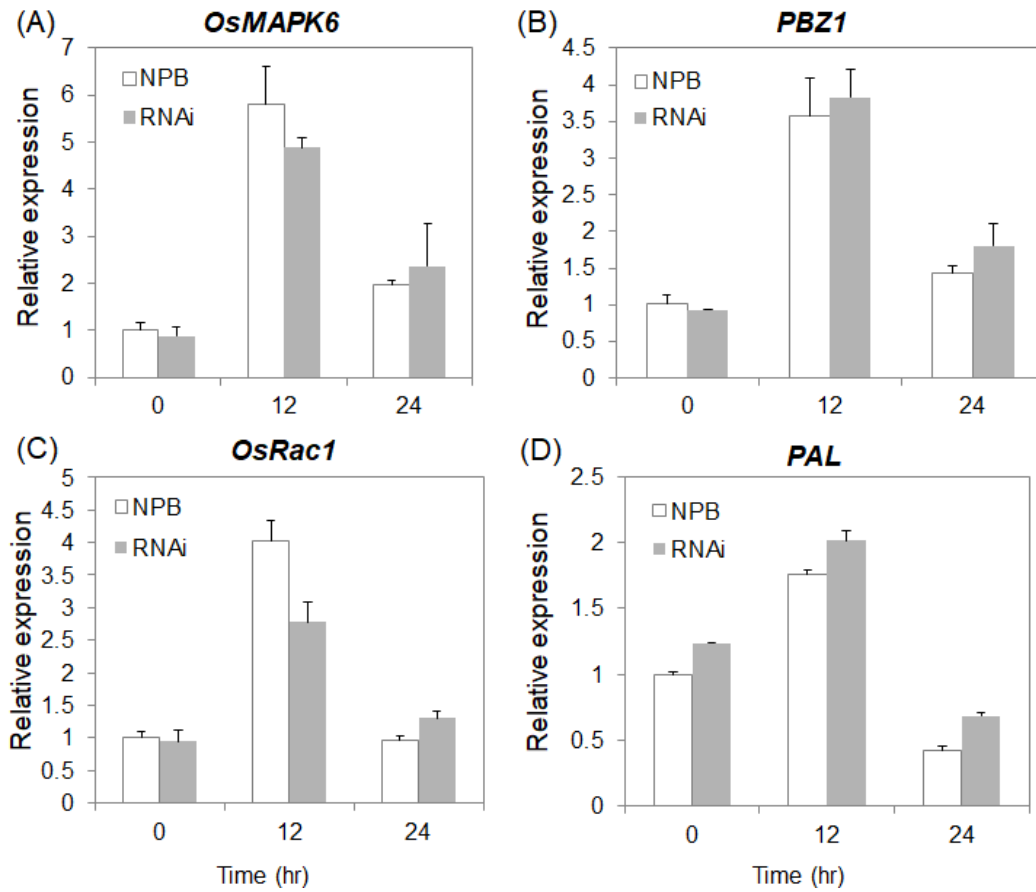

Figure S2. Defense-related genes transcription in the *OsPT8*-RNAi and wild type (NPB) plants after the rice blast pathogen *M. oryzae* or the bacterial blight pathogen *Xoo* inoculation. (A), (B) Time-course relative transcription levels of *MAPK6* and *PBZ1* in *OsPT8*-RNAi and NPB plants after *M. oryzae* isolate 110-2 inoculated; (C), (D) Time-course relative transcription levels of *OsRac1* and *PAL* in *OsPT8*-RNAi and NPB plants after *Xoo* strain PXO99 inoculation. Error bars indicate the SD from three biological replicates (n = 3).

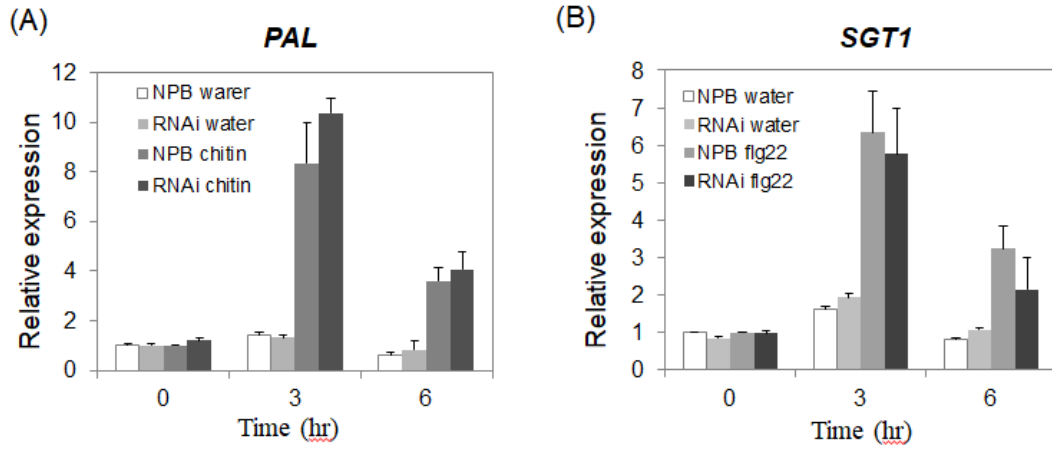

Figure S3. Defense-related gene expression of the *OsPT8*-RNAi and NPB plants after chitin or flg22 treatments. (A) Time-course relative transcript levels of *PAL* in *OsPT8*-RNAi and wild type (NPB) plants after chitin treatment; (B) Time-course relative transcript levels of *SGT1* in *OsPT8*-RNAi and NPB plants after flg22 treatment. Error bars indicate the SD from three biological replicates (n = 3).

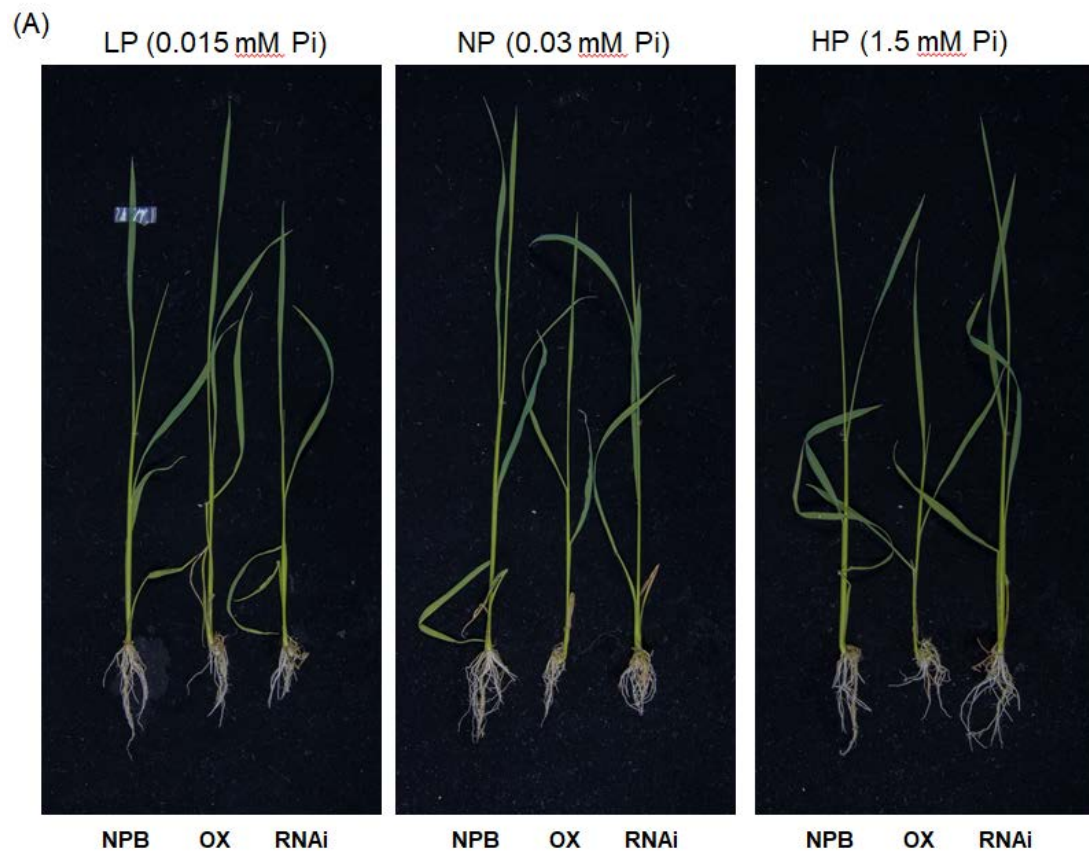

Figure S4. Growth phenotypes of the *OsPT8*-OX, *OsPT8*-RNAi and NPB plants under different phosphate concentrations.

Table S1. Primers used for qPCR

| Name       | ID          | Sequence                       |
|------------|-------------|--------------------------------|
| OsPT8-QF   | LOC4348741  | 5'-GCCAAGAACGCCAAGCAGGC-3'     |
| OsPT8-QR   |             | 5'-GGAGAAGAGGCCGAAGCTGC-3'     |
| PBZ1-QF    | LOC4352491  | 5'-CCCTGCCGAATACGCCTAA-3'      |
| PBZ1-QR    |             | 5'-CTCAAACGCCACGAGAATTTG-3'    |
| OsRac1-QF  | LOC4325879  | 5'-GCCCCATGGATCTACTCAGA-3'     |
| OsRac1-QR  |             | 5'-AAAGGAGCTCCACTGCAGAA-3'     |
| SGT1-QF    | LOC4326682  | 5'-TCATCCCTGAGAAAAGCAGATAC-3'  |
| SGT1-QR    |             | 5'-AAGGATATGATGGCCTCTGG-3'     |
| PAL-QF     | LOC4330040  | 5'-CTACAACAACGGGCTGACCT-3'     |
| PAL-QR     |             | 5'-TCTGGACATGGTTGGTGATG-3'     |
| OsMAPK6-QF | LOC4340170  | 5'-AGTCTGCTCATCACCC TTCAG-3'   |
| OsMAPK6-QR |             | 5'-ACCTTCAGCTTTGAACCAGGG-3'    |
| OsNPR1-QF  | LOC4327315  | 5'-TGAGAGTCTACGAGGAAGGTTGC-3'  |
| OsNPR1-QR  |             | 5'-CGTTGTCTTTCAGGAGGTGGAT-3'   |
| WRKY53-QF  | LOC4338474  | 5'-AACACGGCAATACACACATAC-3'    |
| WRKY53-QR  |             | 5'-TGACCTGTCTCTCAGCAGTTAC-3'   |
| UBQ-QF     | LOC4332169  | 5'-AACCAGCTGAGGCCCAAGA-3'      |
| UBQ-QR     |             | 5'-ACGATTGATTTAACCAGTCCATGA-3' |
| MOPOT2-GQF | MGG_13294.6 | 5'-ACGACCCGTCTTTACTTATTTGG-3'  |
| MOPOT2-GQR |             | 5'-AAGTAGCGTTGGTTTTGTTGGAT-3'  |
| OsUBQ-GQF  |             | 5'-TTCTGGTCCTTCCACTTTCAG-3'    |
| OsUBQ-GQR  |             | 5'-ACGATTGATTTAACCAGTCCATGA-3' |
